# Supplementary material for: Characterizing Effects of Microbial Biostimulants and Whole-Soil Inoculums for Native Plant Revegetation
Source: MDPI journal article supplement (doi:10.3390/microorganisms11010055), 2022-12-24
Supplement: s1 [file s1]

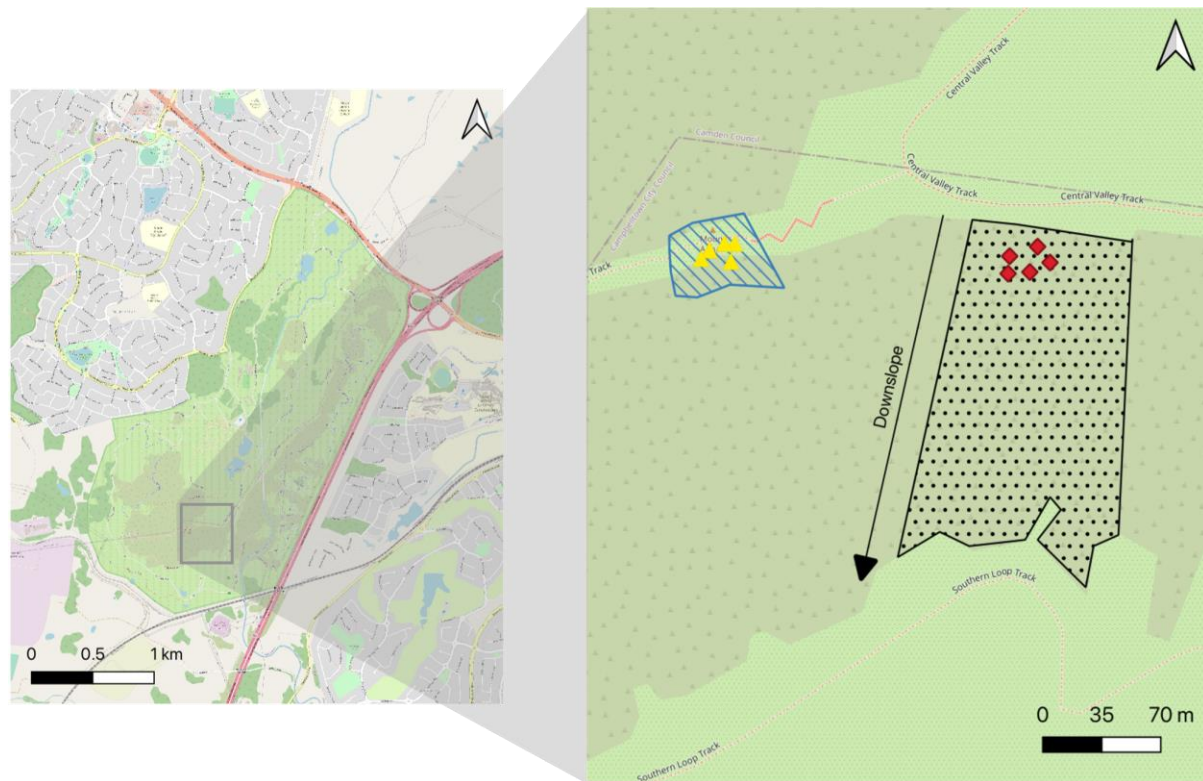

**Figure S1:** Soil Collection Sites at Mount Annan, Australian Royal Botanic Gardens, Sydney NSW underlain by Wianamatta Group shale (-34.078387, 150.764828). The dot-filled area is targeted for restoration from which the soil used in the first trial was collected. The line-filled area is remnant of Western Sydney dry sclerophyll rainforest where the two study species naturally occur and thus is used as the healthy reference site from which the whole soil inoculum was sourced. At each location, the soil top layer was collected from five randomly selected areas.

**Table S1:** Proportions of each component of the extruded seed pellet mixtures per treatment. All components, including liquids, were weighed in grams.

| Component            | Standard Pellet | Vermicast Extract Pellet | Native Soil Pellet |
|----------------------|-----------------|--------------------------|--------------------|
| Cardboard pulp       | 4.59%           | 4.48%                    | 2.3%               |
| Clay                 | 1.53%           | 1.49%                    | 1.53%              |
| Zeolite              | 15.01%          | 14.63%                   | 15.01%             |
| Sand                 | 20.37%          | 19.85%                   | 20.37%             |
| Activated charcoal   | 6.43%           | 6.27%                    | 6.43%              |
| Water                | 52.07%          | 50.75%                   | 52.07%             |
| Vermicast extract    | -               | 2.54%                    | -                  |
| Native Soil Inoculum | -               | -                        | 2.3%               |

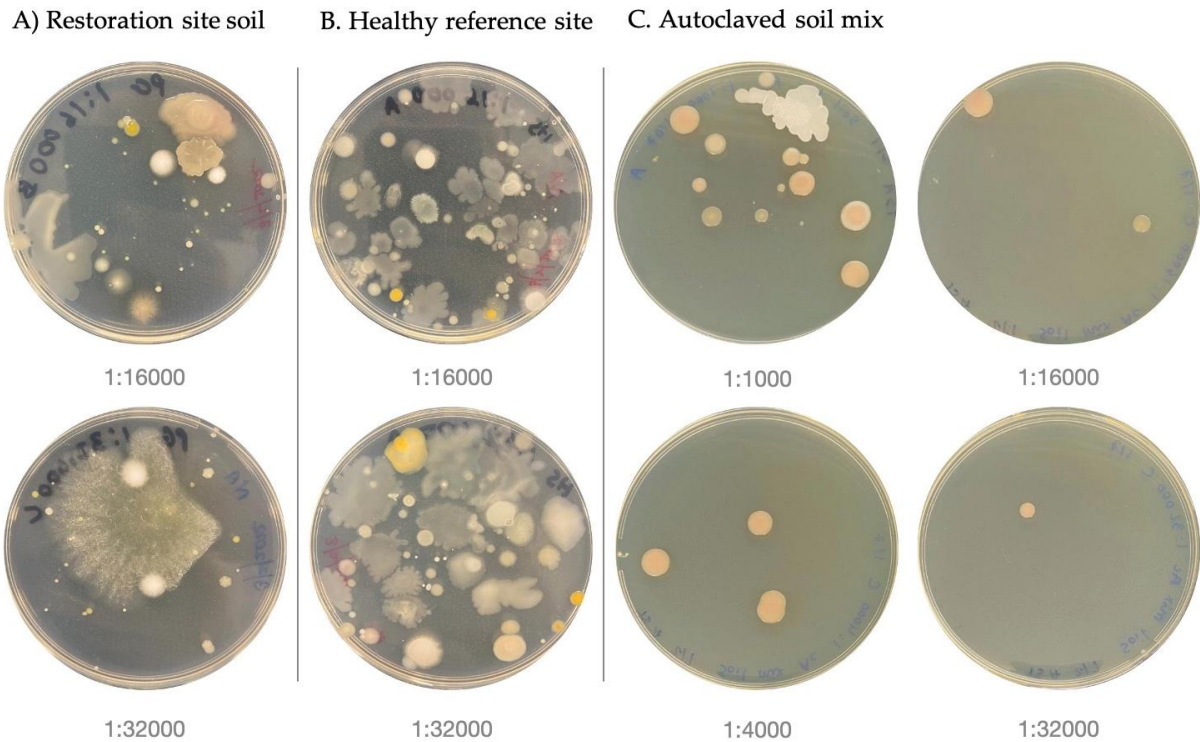

**Figure S2:** Representative tryptic soy agar microbial plates colonies of cultivable microbes observed in A) soil collected at the restoration site at Mount Annan (Trial 1), B) the healthy reference site, and C) the autoclaved soil mix (Trial 2) at multiple PBS dilutions (m/v). Samples were taken at the time of planting.

**Table S2:** Percentage of emerged seedlings that remain alive (%) per fortnight for each species, trial, and seed treatment.

| Species                      | Trial   | Treatment                | Seedling survival at the end of each fortnight (%) |       |       |       |       |
|------------------------------|---------|--------------------------|----------------------------------------------------|-------|-------|-------|-------|
|                              |         |                          | 0-14                                               | 14-28 | 28-42 | 42-56 | 56-70 |
| <i>Acacia parramattensis</i> | Trial 1 | Bare Seed                | 100                                                | 100   | 100   | 96.15 | 96.15 |
|                              |         | Standard Pellet          | 100                                                | 100   | 100   | 96.15 | 96.15 |
|                              |         | Vermicast Extract Pellet | 100                                                | 100   | 100   | 96.15 | 96.15 |
|                              |         | Native Soil Pellet       | 96.15                                              | 96.15 | 96.15 | 92.31 | 92.31 |
|                              | Trial 2 | Bare Seed                | 100                                                | 100   | 100   | 100   | 100   |
|                              |         | Standard Pellet          | 100                                                | 100   | 100   | 100   | 100   |
|                              |         | Vermicast Extract Pellet | 100                                                | 100   | 100   | 100   | 100   |

|                             |         |                          |       |       |       |       |       |
|-----------------------------|---------|--------------------------|-------|-------|-------|-------|-------|
|                             |         | Native Soil Pellet       | 96    | 96    | 96    | 96    | 96    |
| <i>Indigofera australis</i> | Trial 1 | Bare Seed                | 100   | 100   | 100   | 100   | 100   |
|                             |         | Standard Pellet          | 100   | 100   | 100   | 100   | 100   |
|                             |         | Vermicast Extract Pellet | 100   | 90.91 | 90.91 | 90.91 | 90.91 |
|                             |         | Native Soil Pellet       | 93.75 | 93.75 | 93.75 | 93.75 | 93.75 |
|                             | Trial 2 | Bare Seed                | 100   | 100   | 100   | 100   | 100   |
|                             |         | Standard Pellet          | 100   | 100   | 100   | 95    | 95    |
|                             |         | Vermicast Extract Pellet | 100   | 94.74 | 84.21 | 84.21 | 84.21 |
|                             |         | Native Soil Pellet       | 88.24 | 82.35 | 82.35 | 82.35 | 76.47 |

**Table S3:** Statistical comparisons of percentage of emerged seedlings that remain alive (%) at the end of the growth trials. One-way ANOVAs were utilized and, where appropriate, multiple comparisons of means were analyzed using Tukey's multiple comparisons adjustment. Separate comparisons were made between seed treatments per species and trials.

| Species                      | Trial   | One-way ANOVAs output         | Post-hoc output                     |
|------------------------------|---------|-------------------------------|-------------------------------------|
| <i>Acacia parramattensis</i> | Trial 1 | $\chi^2_3 = 2.77, p = 0.42$   | -                                   |
|                              | Trial 2 | $\chi^2_3 = 8.30, p = 0.0401$ | All pairwise comparisons: $p > 0.1$ |
| <i>Indigofera australis</i>  | Trial 1 | $\chi^2_3 = 0.57, p = 0.90$   | -                                   |
|                              | Trial 2 | $\chi^2_3 = 2.84, p = 0.42$   | -                                   |
